# Supplementary material
Source: PubMed Central journal article supplement (PMC2754680)
Supplement: en.2009-0499_1.pdf [file en.2009-0499_1.pdf]

1 **Supplemental Fig. 1. Effects of MXC on methylation of CpG sites in ER $\alpha$  promoter region in adult**  
2 **ovaries.** Shown are representative methylation patterns of six CpG dinucleotides in the rat ER $\alpha$  promoter  
3 region, -186 to -45 upstream of the transcription start site. Bisulfite treatments were performed and PCR  
4 products were cloned. Five clones from 3 animals for each treatment group (n = 15, total of 45 clones)  
5 were sequenced. All unmethylated cytosines that were converted to thymine are shown as open circles,  
6 and methylated cytosines are shown as filled circles. The number of clones with methylation events are  
7 shown as fractions of the total number of clones on the right. No statistically significant differences were  
8 found between control and treated groups.

9  
10

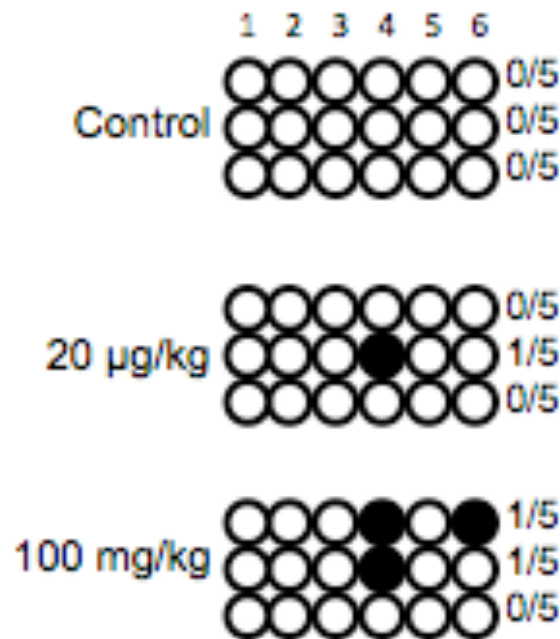

**Supplemental Fig. 1**
