# Supplementary material
Source: PubMed Central journal article supplement (PMC2754680)
Supplement: en.2009-0499_2.pdf [file en.2009-0499_2.pdf]

1 **Supplemental Table 1.** Primer sequences and PCR conditions

| Name      | Primer (5' to 3')                  | Template | Annealing temperature (C) |
|-----------|------------------------------------|----------|---------------------------|
| ERB-UM-F  | AAT TTT TAT TTT TGG GTT TTA TTT    | Bis      | 60                        |
| ERB-UM-R  | CCA CAA CTA ACA AAT ATT AAT ACA TC | Bis      | 60                        |
| ERB-M-F   | AAT TTT TAT TTT CGG GTT TTA TTT C  | Bis      | 60                        |
| ERB-M-R   | CAC GAC TAA CGA ATA TTA ATA CGT C  | Bis      | 60                        |
| Hprt-UM-F | GTT TGG TAG AGT TTT AGG GGA TTG    | Bis      | 60                        |
| Hprt-UM-R | AAT AAA ATA AAT CCA ACG CTC GTC    | Bis      | 60                        |
| Hprt-M-F  | GTT CGG TAG AGT TTT AGG GGA TC     | Bis      | 60                        |
| Hprt-M-R  | AAT AAA ATA AAT CCA ACG CTC GTC    | Bis      | 60                        |
| ERB-392   | TTT TGT TTT TTT GGG GTT TAA GTT A  | Bis      | 56                        |
| ERB-625   | CAA ATC CCC AAA AAT TCT AAA CTT A  | Bis      | 56                        |
| ERA-186   | TTT AGG AAT GTT GAT TTT AGT GGT GT | Bis      | 44                        |
| ERA-45    | TAA ACA AAA CAC TTA ACA ACC CCT C  | Bis      | 44                        |
| Pappa-8   | GAA AGG GGT GTT TTG TTA GGT AGA    | Bis      | 56                        |
| Pappa-300 | CCC AAC ACC ACC TAA ATA TTC TAA AT | Bis      | 56                        |

---

|           |                                     |      |    |
|-----------|-------------------------------------|------|----|
| Dnmt-3a-F | CCA ACA TCG AAT CCA TGA AAA TGG AGG | cDNA | 60 |
| Dnmt-3a-R | CTG GTG GAA TGC ACT GCA GAA GGA G   | cDNA | 60 |
| Dnmt-3b-F | TGA TAT TCT AAT GCC AAA GCT CAC CCG | cDNA | 60 |
| Dnmt-3b-R | ATT CCG GGC ATG GCC TGT CGC TTG     | cDNA | 60 |
| Dnmt-3l-F | CAT AGG CTC CAT CCA GCA TT          | cDNA | 60 |
| Dnmt-3l-R | CCA CGC TGT CTT CCT CTT TC          | cDNA | 60 |
| Hprt-F    | CAG GCC AGA CTT TGT TGG AT          | cDNA | 60 |
| Hprt-R    | CCG CTG TCT TTT AGG CTT TG          | cDNA | 60 |

---

2  
3  
4  
5

UM- unmethylated, M- methylated, F-Forward, R-Reverse, cDNA- complementary DNA, Bis- Bisulfite treated DNA
